# Supplementary material
Source: HighWire-hosted journal article supplement (http://thorax.bmjjournals.com/highwire/filestream/173916/field_highwire_adjunct_files/0/6311981webonly_app.pdf)
Supplement: 6311981webonly_app.pdf [file 6311981webonly_app.pdf]

## **Congenital Malformations in Children Born to Women with Asthma**

### **Additional Data Tables for 11 System-specific Malformation Groups**

|          |                                                                                                       |    |
|----------|-------------------------------------------------------------------------------------------------------|----|
| Table 1  | Risk of nervous system malformation in children born to women with asthma.....                        | 2  |
| Table 2  | Risk of eye, ear, face or neck malformation in children born to women with asthma.....                | 3  |
| Table 3  | Risk of circulatory system malformation in children born to women with asthma.....                    | 4  |
| Table 4  | Risk of respiratory system malformation in children born to women with asthma.....                    | 5  |
| Table 5  | Risk of cleft lip and palate in children born to women with asthma.....                               | 6  |
| Table 6  | Risk of digestive system malformation in children born to women with asthma.....                      | 7  |
| Table 7  | Risk of genital organ malformation in children born to women with asthma.....                         | 8  |
| Table 8  | Risk of urinary system malformation in children born to women with asthma.....                        | 9  |
| Table 9  | Risk of musculoskeletal system malformation in children born to women with asthma.....                | 10 |
| Table 10 | Risk of other non-categorised malformation in children born to women with asthma.....                 | 11 |
| Table 11 | Risk of chromosomal abnormalities not elsewhere classified in children born to women with asthma..... | 12 |

**Table 1 Risk of nervous system malformation in children born to women with asthma**

|                                                                 | cases<br>(n=237) |                  | controls<br>(n=1,377) |                  | Adjusted<br>Odds Ratio <sup>β</sup><br>(95% CI) | p-value |
|-----------------------------------------------------------------|------------------|------------------|-----------------------|------------------|-------------------------------------------------|---------|
|                                                                 | n                | (%) <sup>α</sup> | n                     | (%) <sup>α</sup> |                                                 |         |
| <b>Maternal asthma:</b>                                         |                  |                  |                       |                  |                                                 |         |
| no asthma diagnosis or medications before delivery              | 204              | (86.1)           | 1,205                 | (87.5)           | reference                                       |         |
| asthma diagnosis or medication <sup>γ</sup> before delivery     | 33               | (13.9)           | 172                   | (12.5)           | 1.14(0.78-1.69)                                 | 0.495   |
| diagnosis with no medication before delivery                    | 10               | (4.2)            | 38                    | (2.8)            | 1.59(0.78-3.25)                                 | 0.205   |
| asthma medication <sup>γ</sup> but no diagnosis before delivery | 6                | (2.5)            | 41                    | (3.0)            | 0.88(0.38-2.03)                                 | 0.765   |
| diagnosis and asthma medication <sup>γ</sup> before delivery    | 17               | (7.2)            | 93                    | (6.8)            | 1.08(0.63-1.86)                                 | 0.783   |
| ≥1 asthma exacerbation during pregnancy                         | 0                | (<0.5)           | 2                     | (<0.5)           | n/a                                             | 0.627   |
| <b>≥1 medication exposure during pregnancy*:</b>                |                  |                  |                       |                  |                                                 |         |
| Any asthma medication                                           | 16               | (6.8)            | 99                    | (7.2)            | 0.93(0.55-1.57)                                 | 0.781   |
| Short acting β-agonist                                          | 16               | (6.8)            | 94                    | (6.8)            | 0.98(0.58-1.65)                                 | 0.942   |
| Inhaled corticosteroid                                          | 8                | (3.4)            | 46                    | (3.3)            | 1.04(0.47-2.31)                                 | 0.915   |
| Long acting β-agonist                                           | 2                | (0.8)            | 5                     | (<0.5)           | 2.60(0.39-17.17)                                | 0.322   |
| Oral corticosteroid                                             | 3                | (1.3)            | 6                     | (<0.5)           | 2.93(0.74-11.66)                                | 0.126   |
| Other bronchodilator medication**                               | 0                | (<0.5)           | 3                     | (<0.5)           | n/a                                             |         |
| Other anti-inflammatory medication***                           | 0                | (<0.5)           | 2                     | (<0.5)           | n/a                                             |         |

<sup>α</sup> Proportion of cases or controls whose mothers have diagnosis or at least one selected drug prescription in pregnancy

<sup>β</sup> Odds Ratios (95% Confidence Intervals) adjusted for maternal age at birth of case or control child; Maternal smoking status, body mass index, socioeconomic status, sex of the child, gestation of pregnancy had no confounding effects.

<sup>γ</sup> Any asthma medication except oral corticosteroids

\*Reference groups are mothers with no prescriptions for the selected drug group in pregnancy

\*\*Aminophylline, theophylline, ephedrine, orciprenaline, tiotropium, or ipratropium

\*\*\*Cromoglicic acid, nedocromil, montelukast or zafirlukast

**Table 2 Risk of eye, ear, face or neck malformation in children born to women with asthma**

|                                                                 | cases<br>(n=293)   | controls<br>(n=1,718) | Adjusted<br>Odds Ratio <sup>β</sup> | p-value |
|-----------------------------------------------------------------|--------------------|-----------------------|-------------------------------------|---------|
|                                                                 | n (%) <sup>α</sup> | n (%) <sup>α</sup>    | (95% CI)                            |         |
| <b>Maternal asthma:</b>                                         |                    |                       |                                     |         |
| no asthma diagnosis or medications before delivery              | 262 (89.4)         | 1,529 (89.0)          | reference                           |         |
| asthma diagnosis or medication <sup>γ</sup> before delivery     | 31 (10.6)          | 189 (11.0)            | 0.96(0.64-1.44)                     | 0.844   |
| diagnosis with no medication before delivery                    | 7 (2.4)            | 31 (1.8)              | 1.30(0.55-3.04)                     | 0.552   |
| asthma medication <sup>γ</sup> but no diagnosis before delivery | 7 (2.4)            | 58 (3.4)              | 0.70(0.32-1.50)                     | 0.356   |
| diagnosis and asthma medication <sup>γ</sup> before delivery    | 17 (5.8)           | 100 (5.8)             | 1.01(0.58-1.76)                     | 0.972   |
| ≥1 asthma exacerbation during pregnancy                         | 1 (<0.5)           | 7 (<0.5)              | 0.85(0.10-7.02)                     | 0.880   |
| <b>≥1 medication exposure during pregnancy*:</b>                |                    |                       |                                     |         |
| Any asthma medication                                           | 17 (5.8)           | 122 (7.1)             | 0.81(0.48-1.38)                     | 0.439   |
| Short acting β-agonist                                          | 15 (5.1)           | 109 (6.3)             | 0.80(0.46-1.40)                     | 0.431   |
| Inhaled corticosteroid                                          | 9 (3.1)            | 65 (3.8)              | 0.82(0.41-1.62)                     | 0.565   |
| Long acting β-agonist                                           | 1 (<0.5)           | 8 (<0.5)              | 0.75(0.09-6.04)                     | 0.786   |
| Oral corticosteroid                                             | 4 (1.4)            | 12 (0.7)              | 1.99(0.64-6.22)                     | 0.238   |
| Other bronchodilator medication**                               | 1 (<0.5)           | 5 (<0.5)              | 1.19(0.14-10.13)                    | 0.872   |
| Other anti-inflammatory medication***                           | 1 (<0.5)           | 5 (<0.5)              | 1.20(0.14-10.30)                    | 0.868   |

<sup>α</sup> Proportion of cases or controls whose mothers have diagnosis or at least one selected drug prescription in pregnancy

<sup>β</sup> Odds Ratios (95% Confidence Intervals) adjusted for maternal age at birth of case or control child; Maternal smoking status, body mass index, socioeconomic status, sex of the child, gestation of pregnancy had no confounding effects.

<sup>γ</sup> Any asthma medication except oral corticosteroids

\*Reference groups are mothers with no prescriptions for the selected drug group in pregnancy

\*\*Aminophylline, theophylline, ephedrine, orciprenaline, tiotropium, or ipratropium

\*\*\*Cromoglicic acid, nedocromil, montelukast or zafirlukast

**Table 3 Risk of circulatory system malformation in children born to women with asthma**

|                                                                 | cases<br>(n=1,256) |                  | controls<br>(n=7,356) |                  | Adjusted<br>Odds Ratio <sup>β</sup> | p-value |
|-----------------------------------------------------------------|--------------------|------------------|-----------------------|------------------|-------------------------------------|---------|
|                                                                 | n                  | (%) <sup>α</sup> | n                     | (%) <sup>α</sup> | (95% CI)                            |         |
| <b>Maternal asthma:</b>                                         |                    |                  |                       |                  |                                     |         |
| no asthma diagnosis or medications before delivery              | 1,073              | (85.4)           | 6,429                 | (87.4)           | reference                           |         |
| asthma diagnosis or medication <sup>γ</sup> before delivery     | 183                | (14.6)           | 927                   | (12.6)           | 1.20(1.01-1.43)                     | 0.037   |
| diagnosis with no medication before delivery                    | 37                 | (2.9)            | 213                   | (2.9)            | 1.07(0.74-1.54)                     | 0.714   |
| asthma medication <sup>γ</sup> but no diagnosis before delivery | 51                 | (4.1)            | 227                   | (3.1)            | 1.36(0.99-1.86)                     | 0.055   |
| diagnosis and asthma medication <sup>γ</sup> before delivery    | 95                 | (7.6)            | 487                   | (6.6)            | 1.18(0.94-1.49)                     | 0.163   |
| ≥1 asthma exacerbation during pregnancy                         | 6                  | (<0.5)           | 24                    | (<0.5)           | 1.44(0.51-4.05)                     | 0.495   |
| <b>≥1 medication exposure during pregnancy*:</b>                |                    |                  |                       |                  |                                     |         |
| Any asthma medication                                           | 113                | (9.0)            | 535                   | (7.3)            | 1.27(1.02-1.58)                     | 0.032   |
| Short acting β-agonist                                          | 107                | (8.5)            | 497                   | (6.8)            | 1.29(1.03-1.61)                     | 0.024   |
| Inhaled corticosteroid                                          | 68                 | (5.4)            | 293                   | (4.0)            | 1.38(1.04-1.82)                     | 0.025   |
| Long acting β-agonist                                           | 9                  | (0.7)            | 49                    | (0.7)            | 1.05(0.48-2.27)                     | 0.910   |
| Oral corticosteroid                                             | 15                 | (1.2)            | 48                    | (0.7)            | 1.85(1.03-3.33)                     | 0.040   |
| Other bronchodilator medication**                               | 6                  | (<0.5)           | 20                    | (<0.5)           | 1.80(0.74-4.42)                     | 0.198   |
| Other anti-inflammatory medication***                           | 1                  | (<0.5)           | 4                     | (<0.5)           | 1.47(0.16-13.65)                    | 0.733   |

<sup>α</sup> Proportion of cases or controls whose mothers have diagnosis or at least one selected drug prescription in pregnancy

<sup>β</sup> Odds Ratios (95% Confidence Intervals) adjusted for maternal age at birth of case or control child; Maternal smoking status, body mass index, socioeconomic status, sex of the child, gestation of pregnancy had no confounding effects.

<sup>γ</sup> Any asthma medication except oral corticosteroids

\*Reference groups are mothers with no prescriptions for the selected drug group in pregnancy

\*\*Aminophylline, theophylline, ephedrine, orciprenaline, tiotropium, or ipratropium

\*\*\*Cromoglicate, nedocromil, montelukast or zafirlukast

**Table 4 Risk of respiratory system malformation in children born to women with asthma**

|                                                                 | cases<br>(n=46) |                  | controls<br>(n=265) |                  | Adjusted<br>Odds Ratio <sup>β</sup><br>(95% CI) | p-value |
|-----------------------------------------------------------------|-----------------|------------------|---------------------|------------------|-------------------------------------------------|---------|
|                                                                 | n               | (%) <sup>α</sup> | n                   | (%) <sup>α</sup> |                                                 |         |
| <b>Maternal asthma:</b>                                         |                 |                  |                     |                  |                                                 |         |
| no asthma diagnosis or medications before delivery              | 38              | (82.6)           | 228                 | (86.0)           | reference                                       |         |
| asthma diagnosis or medication <sup>γ</sup> before delivery     | 8               | (17.4)           | 37                  | (14.0)           | 1.30(0.50-3.39)                                 | 0.596   |
| diagnosis with no medication before delivery                    | 1               | (2.2)            | 7                   | (2.6)            | 0.70(0.07-6.93)                                 | 0.761   |
| asthma medication <sup>γ</sup> but no diagnosis before delivery | 2               | (4.3)            | 11                  | (4.2)            | 1.14(0.25-5.20)                                 | 0.865   |
| diagnosis and asthma medication <sup>γ</sup> before delivery    | 5               | (10.9)           | 19                  | (7.2)            | 1.71(0.50-5.78)                                 | 0.390   |
| ≥1 asthma exacerbation during pregnancy                         | 0               | (<0.5)           | 0                   | (<0.5)           | n/a                                             |         |
| <b>≥1 medication exposure during pregnancy*:</b>                |                 |                  |                     |                  |                                                 |         |
| Any asthma medication                                           | 6               | (13.0)           | 21                  | (7.9)            | 1.92(0.65-5.65)                                 | 0.236   |
| Short acting β-agonist                                          | 6               | (13.0)           | 20                  | (7.5)            | 2.04(0.68-6.13)                                 | 0.203   |
| Inhaled corticosteroid                                          | 3               | (6.5)            | 12                  | (4.5)            | 1.67(0.35-8.02)                                 | 0.519   |
| Long acting β-agonist                                           | 0               | (<0.5)           | 1                   | (<0.5)           | n/a                                             |         |
| Oral corticosteroid                                             | 0               | (<0.5)           | 1                   | (<0.5)           | n/a                                             |         |
| Other bronchodilator medication**                               | 0               | (<0.5)           | 0                   | (<0.5)           | n/a                                             |         |
| Other anti-inflammatory medication***                           | 0               | (<0.5)           | 0                   | (<0.5)           | n/a                                             |         |

<sup>α</sup> Proportion of cases or controls whose mothers have diagnosis or at least one selected drug prescription in pregnancy

<sup>β</sup> Odds Ratios (95% Confidence Intervals) adjusted for maternal age at birth of case or control child; Maternal smoking status, body mass index, socioeconomic status, sex of the child, gestation of pregnancy had no confounding effects.

<sup>γ</sup> Any asthma medication except oral corticosteroids

\*Reference groups are mothers with no prescriptions for the selected drug group in pregnancy

\*\*Aminophylline, theophylline, ephedrine, orciprenaline, tiotropium, or ipratropium

\*\*\*Cromoglicic acid, nedocromil, montelukast or zafirlukast

**Table 5 Risk of cleft lip and/or palate in children born to women with asthma**

|                                                                 | cases<br>(n=255) |                  | controls<br>(n=1,513) |                  | Adjusted<br>Odds Ratio <sup>β</sup><br>(95% CI) | p-value |
|-----------------------------------------------------------------|------------------|------------------|-----------------------|------------------|-------------------------------------------------|---------|
|                                                                 | n                | (%) <sup>α</sup> | n                     | (%) <sup>α</sup> |                                                 |         |
| <b>Maternal asthma:</b>                                         |                  |                  |                       |                  |                                                 |         |
| no asthma diagnosis or medications before delivery              | 214              | (83.9)           | 1,296                 | (85.7)           | reference                                       |         |
| asthma diagnosis or medication <sup>γ</sup> before delivery     | 41               | (16.1)           | 217                   | (14.3)           | 1.15(0.79-1.67)                                 | 0.477   |
| diagnosis with no medication before delivery                    | 11               | (4.3)            | 55                    | (3.6)            | 1.25(0.60-2.61)                                 | 0.559   |
| asthma medication <sup>γ</sup> but no diagnosis before delivery | 12               | (4.7)            | 59                    | (3.9)            | 1.24(0.65-2.37)                                 | 0.506   |
| diagnosis and asthma medication <sup>γ</sup> before delivery    | 18               | (7.1)            | 103                   | (6.8)            | 1.05(0.62-1.77)                                 | 0.852   |
| ≥1 asthma exacerbation during pregnancy                         | 0                | (<0.5)           | 7                     | (<0.5)           | n/a                                             |         |
| <b>≥1 medication exposure during pregnancy*:</b>                |                  |                  |                       |                  |                                                 |         |
| Any asthma medication                                           | 16               | (6.3)            | 126                   | (8.3)            | 0.73(0.43-1.24)                                 | 0.246   |
| Short acting β-agonist                                          | 14               | (5.5)            | 115                   | (7.6)            | 0.69(0.39-1.24)                                 | 0.216   |
| Inhaled corticosteroid                                          | 5                | (2.0)            | 64                    | (4.2)            | 0.45(0.18-1.11)                                 | 0.082   |
| Long acting β-agonist                                           | 0                | (<0.5)           | 7                     | (<0.5)           | n/a                                             |         |
| Oral corticosteroid                                             | 1                | (<0.5)           | 13                    | (0.9)            | 0.47(0.06-3.67)                                 | 0.471   |
| Other bronchodilator medication**                               | 1                | (<0.5)           | 8                     | (0.5)            | 0.80(0.10-6.44)                                 | 0.832   |
| Other anti-inflammatory medication***                           | 1                | (<0.5)           | 2                     | (<0.5)           | 3.21(0.29-35.08)                                | 0.340   |

<sup>α</sup> Proportion of cases or controls whose mothers have diagnosis or at least one selected drug prescription in pregnancy

<sup>β</sup> Odds Ratios (95% Confidence Intervals) adjusted for maternal age at birth of case or control child; Maternal smoking status, body mass index, socioeconomic status, sex of the child, gestation of pregnancy had no confounding effects.

<sup>γ</sup> Any asthma medication except oral corticosteroids

\*Reference groups are mothers with no prescriptions for the selected drug group in pregnancy

\*\*Aminophylline, theophylline, ephedrine, orciprenaline, tiotropium, or ipratropium

\*\*\*Cromoglicic acid, nedocromil, montelukast or zafirlukast

**Table 6 Risk of digestive system malformation in children born to women with asthma**

|                                                                 | cases<br>(n=166) |                  | controls<br>(n=974) |                  | Adjusted<br>Odds Ratio <sup>β</sup><br>(95% CI) | p-value |
|-----------------------------------------------------------------|------------------|------------------|---------------------|------------------|-------------------------------------------------|---------|
|                                                                 | n                | (%) <sup>α</sup> | n                   | (%) <sup>α</sup> |                                                 |         |
| <b>Maternal asthma:</b>                                         |                  |                  |                     |                  |                                                 |         |
| no asthma diagnosis or medications before delivery              | 139              | (83.7)           | 825                 | (84.7)           | reference                                       |         |
| asthma diagnosis or medication <sup>γ</sup> before delivery     | 27               | (16.3)           | 149                 | (15.3)           | 1.10(0.71-1.70)                                 | 0.670   |
| diagnosis with no medication before delivery                    | 4                | (2.4)            | 45                  | (4.6)            | 0.54(0.19-1.52)                                 | 0.243   |
| asthma medication <sup>γ</sup> but no diagnosis before delivery | 11               | (6.6)            | 36                  | (3.7)            | 1.86(0.96-3.62)                                 | 0.066   |
| diagnosis and asthma medication <sup>γ</sup> before delivery    | 12               | (7.2)            | 68                  | (7.0)            | 1.03(0.53-2.00)                                 | 0.932   |
| ≥1 asthma exacerbation during pregnancy                         | 0                | (<0.5)           | 2                   | (<0.5)           | n/a                                             |         |
| <b>≥1 medication exposure during pregnancy*:</b>                |                  |                  |                     |                  |                                                 |         |
| Any asthma medication                                           | 20               | (12.0)           | 77                  | (7.9)            | 1.65(0.99-2.74)                                 | 0.053   |
| Short acting β-agonist                                          | 18               | (10.8)           | 76                  | (7.8)            | 1.47(0.86-2.51)                                 | 0.156   |
| Inhaled corticosteroid                                          | 8                | (4.8)            | 41                  | (4.2)            | 1.17(0.50-2.69)                                 | 0.719   |
| Long acting β-agonist                                           | 0                | (<0.5)           | 2                   | (<0.5)           | n/a                                             |         |
| Oral corticosteroid                                             | 2                | (1.2)            | 8                   | (0.8)            | 1.38(0.32-5.97)                                 | 0.669   |
| Other bronchodilator medication**                               | 1                | (0.6)            | 0                   | (<0.5)           | n/a                                             |         |
| Other anti-inflammatory medication***                           | 0                | (<0.5)           | 0                   | (<0.5)           | n/a                                             |         |

<sup>α</sup> Proportion of cases or controls whose mothers have diagnosis or at least one selected drug prescription in pregnancy

<sup>β</sup> Odds Ratios (95% Confidence Intervals) adjusted for maternal age at birth of case or control child; Maternal smoking status, body mass index, socioeconomic status, sex of the child, gestation of pregnancy had no confounding effects.

<sup>γ</sup> Any asthma medication except oral corticosteroids

\*Reference groups are mothers with no prescriptions for the selected drug group in pregnancy

\*\*Aminophylline, theophylline, ephedrine, orciprenaline, tiotropium, or ipratropium

\*\*\*Cromoglicate, nedocromil, montelukast or zafirlukast

**Table 7 Risk of genital organ malformation in children born to women with asthma**

|                                                                 | cases<br>(n=913) |                  | controls<br>(n=5,345) |                  | Adjusted<br>Odds Ratio <sup>β</sup> | p-value |
|-----------------------------------------------------------------|------------------|------------------|-----------------------|------------------|-------------------------------------|---------|
|                                                                 | n                | (%) <sup>α</sup> | n                     | (%) <sup>α</sup> | (95% CI)                            |         |
| <b>Maternal asthma:</b>                                         |                  |                  |                       |                  |                                     |         |
| no asthma diagnosis or medications before delivery              | 797              | (87.3)           | 4,675                 | (87.5)           | reference                           |         |
| asthma diagnosis or medication <sup>γ</sup> before delivery     | 116              | (12.7)           | 670                   | (12.5)           | 1.01(0.82-1.26)                     | 0.904   |
| diagnosis with no medication before delivery                    | 30               | (3.3)            | 138                   | (2.6)            | 1.31(0.87-1.97)                     | 0.203   |
| asthma medication <sup>γ</sup> but no diagnosis before delivery | 29               | (3.2)            | 194                   | (3.6)            | 0.89(0.59-1.33)                     | 0.559   |
| diagnosis and asthma medication <sup>γ</sup> before delivery    | 57               | (6.2)            | 338                   | (6.3)            | 0.98(0.73-1.31)                     | 0.874   |
| ≥1 asthma exacerbation during pregnancy                         | 3                | (<0.5)           | 21                    | (<0.5)           | 0.66(0.23-1.89)                     | 0.439   |
| <b>≥1 medication exposure during pregnancy*:</b>                |                  |                  |                       |                  |                                     |         |
| Any asthma medication                                           | 69               | (7.6)            | 408                   | (7.6)            | 0.98(0.74-1.28)                     | 0.865   |
| Short acting β-agonist                                          | 64               | (7.0)            | 375                   | (7.0)            | 0.98(0.74-1.30)                     | 0.905   |
| Inhaled corticosteroid                                          | 37               | (4.1)            | 225                   | (4.2)            | 0.93(0.65-1.32)                     | 0.681   |
| Long acting β-agonist                                           | 3                | (<0.5)           | 24                    | (<0.5)           | 0.72(0.22-2.35)                     | 0.582   |
| Oral corticosteroid                                             | 10               | (1.1)            | 40                    | (0.7)            | 1.33(0.68-2.61)                     | 0.407   |
| Other bronchodilator medication**                               | 3                | (<0.5)           | 15                    | (<0.5)           | 1.11(0.34-3.63)                     | 0.863   |
| Other anti-inflammatory medication***                           | 1                | (<0.5)           | 9                     | (<0.5)           | 0.67(0.08-5.23)                     | 0.699   |

<sup>α</sup> Proportion of cases or controls whose mothers have diagnosis or at least one selected drug prescription in pregnancy

<sup>β</sup> Odds Ratios (95% Confidence Intervals) adjusted for maternal age at birth of case or control child; Maternal smoking status, body mass index, socioeconomic status, sex of the child, gestation of pregnancy had no confounding effects.

<sup>γ</sup> Any asthma medication except oral corticosteroids

\*Reference groups are mothers with no prescriptions for the selected drug group in pregnancy

\*\*Aminophylline, theophylline, ephedrine, orciprenaline, tiotropium, or ipratropium

\*\*\*Cromoglicate, nedocromil, montelukast or zafirlukast



**Table 8 Risk of urinary system malformation in children born to women with asthma**

|                                                                 | cases<br>(n=313) |                  | controls<br>(n=1,850) |                  | Adjusted<br>Odds Ratio <sup>β</sup> | p-value |
|-----------------------------------------------------------------|------------------|------------------|-----------------------|------------------|-------------------------------------|---------|
|                                                                 | n                | (%) <sup>α</sup> | n                     | (%) <sup>α</sup> | (95% CI)                            |         |
| <b>Maternal asthma:</b>                                         |                  |                  |                       |                  |                                     |         |
| no asthma diagnosis or medications before delivery              | 267              | (85.3)           | 1,628                 | (88.0)           | reference                           |         |
| asthma diagnosis or medication <sup>γ</sup> before delivery     | 46               | (14.7)           | 222                   | (12.0)           | 1.25(0.89-1.76)                     | 0.193   |
| diagnosis with no medication before delivery                    | 14               | (4.5)            | 54                    | (2.9)            | 1.59(0.87-2.90)                     | 0.132   |
| asthma medication <sup>γ</sup> but no diagnosis before delivery | 11               | (3.5)            | 45                    | (2.4)            | 1.50(0.77-2.90)                     | 0.232   |
| diagnosis and asthma medication <sup>γ</sup> before delivery    | 21               | (6.7)            | 123                   | (6.6)            | 1.03(0.63-1.68)                     | 0.921   |
| ≥1 asthma exacerbation during pregnancy                         | 2                | (0.6)            | 3                     | (<0.5)           | 4.32(0.74-25.21)                    | 0.104   |
| <b>≥1 medication exposure during pregnancy*:</b>                |                  |                  |                       |                  |                                     |         |
| Any asthma medication                                           | 25               | (8.0)            | 131                   | (7.1)            | 1.13(0.72-1.77)                     | 0.594   |
| Short acting β-agonist                                          | 24               | (7.7)            | 122                   | (6.6)            | 1.16(0.74-1.83)                     | 0.518   |
| Inhaled corticosteroid                                          | 11               | (3.5)            | 75                    | (4.1)            | 0.83(0.42-1.63)                     | 0.587   |
| Long acting β-agonist                                           | 0                | (<0.5)           | 12                    | (0.6)            | n/a                                 |         |
| Oral corticosteroid                                             | 4                | (1.3)            | 10                    | (0.5)            | 2.40(0.76-7.60)                     | 0.138   |
| Other bronchodilator medication**                               | 1                | (<0.5)           | 1                     | (<0.5)           | 6.39(0.40-102.91)                   | 0.191   |
| Other anti-inflammatory medication***                           | 0                | (<0.5)           | 0                     | (<0.5)           | n/a                                 |         |

<sup>α</sup> Proportion of cases or controls whose mothers have diagnosis or at least one selected drug prescription in pregnancy

<sup>β</sup> Odds Ratios (95% Confidence Intervals) adjusted for maternal age at birth of case or control child; Maternal smoking status, body mass index, socioeconomic status, sex of the child, gestation of pregnancy had no confounding effects.

<sup>γ</sup> Any asthma medication except oral corticosteroids

\*Reference groups are mothers with no prescriptions for the selected drug group in pregnancy

\*\*Aminophylline, theophylline, ephedrine, orciprenaline, tiotropium, or ipratropium

\*\*\*Cromoglicate, nedocromil, montelukast or zafirlukast

**Table 9 Risk of musculoskeletal system malformation in children born to women with asthma**

|                                                                 | cases<br>(n=1,431) |                  | controls<br>(n=8,372) |                  | Adjusted<br>Odds Ratio <sup>β</sup> | p-value |
|-----------------------------------------------------------------|--------------------|------------------|-----------------------|------------------|-------------------------------------|---------|
|                                                                 | n                  | (%) <sup>α</sup> | n                     | (%) <sup>α</sup> | (95% CI)                            |         |
| <b>Maternal asthma:</b>                                         |                    |                  |                       |                  |                                     |         |
| no asthma diagnosis or medications before delivery              | 1,213              | (84.8)           | 7,304                 | (87.2)           | reference                           |         |
| asthma diagnosis or medication <sup>γ</sup> before delivery     | 218                | (15.2)           | 1,068                 | (12.8)           | 1.25(1.06-1.47)                     | 0.009   |
| diagnosis with no medication before delivery                    | 50                 | (3.5)            | 246                   | (2.9)            | 1.23(0.89-1.70)                     | 0.214   |
| asthma medication <sup>γ</sup> but no diagnosis before delivery | 64                 | (4.5)            | 266                   | (3.2)            | 1.46(1.11-1.93)                     | 0.007   |
| diagnosis and asthma medication <sup>γ</sup> before delivery    | 104                | (7.3)            | 556                   | (6.6)            | 1.14(0.91-1.43)                     | 0.241   |
| ≥1 asthma exacerbation during pregnancy                         | 6                  | (<0.5)           | 22                    | (<0.5)           | 1.71(0.70-4.17)                     | 0.241   |
| <b>≥1 medication exposure during pregnancy*:</b>                |                    |                  |                       |                  |                                     |         |
| Any asthma medication                                           | 125                | (8.7)            | 638                   | (7.6)            | 1.16(0.95-1.43)                     | 0.143   |
| Short acting β-agonist                                          | 118                | (8.2)            | 598                   | (7.1)            | 1.17(0.95-1.45)                     | 0.132   |
| Inhaled corticosteroid                                          | 68                 | (4.8)            | 355                   | (4.2)            | 1.13(0.86-1.48)                     | 0.383   |
| Long acting β-agonist                                           | 10                 | (0.7)            | 29                    | (<0.5)           | 2.12(1.00-4.49)                     | 0.050   |
| Oral corticosteroid                                             | 8                  | (0.6)            | 65                    | (0.8)            | 0.71(0.33-1.52)                     | 0.381   |
| Other bronchodilator medication**                               | 2                  | (<0.5)           | 14                    | (<0.5)           | 0.84(0.19-3.63)                     | 0.814   |
| Other anti-inflammatory medication***                           | 5                  | (<0.5)           | 4                     | (<0.5)           | 9.38(2.31-38.10)                    | 0.002   |

<sup>α</sup> Proportion of cases or controls whose mothers have diagnosis or at least one selected drug prescription in pregnancy

<sup>β</sup> Odds Ratios (95% Confidence Intervals) adjusted for maternal age at birth of case or control child; Maternal smoking status, body mass index, socioeconomic status, sex of the child, gestation of pregnancy had no confounding effects.

<sup>γ</sup> Any asthma medication except oral corticosteroids

\*Reference groups are mothers with no prescriptions for the selected drug group in pregnancy

\*\*Aminophylline, theophylline, ephedrine, orciprenaline, tiotropium, or ipratropium

\*\*\*Cromoglicate, nedocromil, montelukast or zafirlukast

**Table 10 Risk of other non-categorised malformation in children born to women with asthma**

|                                                                 | cases<br>(n=407) |                  | controls<br>(n=2,400) |                  | Adjusted<br>Odds Ratio <sup>β</sup> | p-value |
|-----------------------------------------------------------------|------------------|------------------|-----------------------|------------------|-------------------------------------|---------|
|                                                                 | n                | (%) <sup>α</sup> | n                     | (%) <sup>α</sup> | (95% CI)                            |         |
| <b>Maternal asthma:</b>                                         |                  |                  |                       |                  |                                     |         |
| no asthma diagnosis or medications before delivery              | 356              | (87.5)           | 2,102                 | (87.6)           | reference                           |         |
| asthma diagnosis or medication <sup>γ</sup> before delivery     | 51               | (12.5)           | 298                   | (12.4)           | 1.04(0.76-1.44)                     | 0.795   |
| diagnosis with no medication before delivery                    | 14               | (3.4)            | 70                    | (2.9)            | 1.23(0.68-2.21)                     | 0.499   |
| asthma medication <sup>γ</sup> but no diagnosis before delivery | 8                | (2.0)            | 73                    | (3.0)            | 0.65(0.31-1.36)                     | 0.258   |
| diagnosis and asthma medication <sup>γ</sup> before delivery    | 29               | (7.1)            | 155                   | (6.5)            | 1.15(0.75-1.77)                     | 0.518   |
| ≥1 asthma exacerbation during pregnancy                         | 2                | (<0.5)           | 7                     | (<0.5)           | 1.94(0.40-9.37)                     | 0.408   |
| <b>≥1 medication exposure during pregnancy*:</b>                |                  |                  |                       |                  |                                     |         |
| Any asthma medication                                           | 30               | (7.4)            | 173                   | (7.2)            | 1.04(0.69-1.58)                     | 0.842   |
| Short acting β-agonist                                          | 25               | (6.1)            | 164                   | (6.8)            | 0.50(0.24-1.06)                     | 0.070   |
| Inhaled corticosteroid                                          | 19               | (4.7)            | 92                    | (3.8)            | 1.27(0.76-2.13)                     | 0.361   |
| Long acting β-agonist                                           | 1                | (<0.5)           | 8                     | (<0.5)           | 0.80(0.10-6.58)                     | 0.837   |
| Oral corticosteroid                                             | 3                | (0.7)            | 21                    | (0.9)            | 0.81(0.24-2.78)                     | 0.741   |
| Other bronchodilator medication**                               | 1                | (<0.5)           | 6                     | (<0.5)           | 0.95(0.12-7.84)                     | 0.963   |
| Other anti-inflammatory medication***                           | 0                | (<0.5)           | 0                     | (<0.5)           | n/a                                 |         |

<sup>α</sup> Proportion of cases or controls whose mothers have diagnosis or at least one selected drug prescription in pregnancy

<sup>β</sup> Odds Ratios (95% Confidence Intervals) adjusted for maternal age at birth of case or control child; Maternal smoking status, body mass index, socioeconomic status, sex of the child, gestation of pregnancy had no confounding effects.

<sup>γ</sup> Any asthma medication except oral corticosteroids

\*Reference groups are mothers with no prescriptions for the selected drug group in pregnancy

\*\*Aminophylline, theophylline, ephedrine, orciprenaline, tiotropium, or ipratropium

\*\*\*Cromoglicate, nedocromil, montelukast or zafirlukast

**Table 11 Risk of chromosomal abnormalities not elsewhere classified in children born to women with asthma**

|                                                                 | cases<br>(n=260) |                  | controls<br>(n=1,519) |                  | Adjusted<br>Odds Ratio <sup>β</sup> | p-value |
|-----------------------------------------------------------------|------------------|------------------|-----------------------|------------------|-------------------------------------|---------|
|                                                                 | n                | (%) <sup>α</sup> | n                     | (%) <sup>α</sup> | (95% CI)                            |         |
| <b>Maternal asthma:</b>                                         |                  |                  |                       |                  |                                     |         |
| no asthma diagnosis or medications before delivery              | 238              | (91.5)           | 1,320                 | (86.9)           | reference                           |         |
| asthma diagnosis or medication <sup>γ</sup> before delivery     | 22               | (8.5)            | 199                   | (13.1)           | 0.62(0.37-1.03)                     | 0.066   |
| diagnosis with no medication before delivery                    | 9                | (3.5)            | 57                    | (3.8)            | 1.01(0.43-2.36)                     | 0.984   |
| asthma medication <sup>γ</sup> but no diagnosis before delivery | 7                | (2.7)            | 55                    | (3.6)            | 0.59(0.25-1.41)                     | 0.236   |
| diagnosis and asthma medication <sup>γ</sup> before delivery    | 6                | (2.3)            | 87                    | (5.7)            | 0.43(0.18-1.02)                     | 0.054   |
| ≥1 asthma exacerbation during pregnancy                         | 0                | (<0.5)           | 2                     | (<0.5)           | n/a                                 |         |
| <b>≥1 medication exposure during pregnancy*:</b>                |                  |                  |                       |                  |                                     |         |
| Any asthma medication                                           | 9                | (3.5)            | 106                   | (7.0)            | 0.45(0.22-0.95)                     | 0.035   |
| Short acting β-agonist                                          | 9                | (3.5)            | 99                    | (6.5)            | 0.50(0.24-1.06)                     | 0.070   |
| Inhaled corticosteroid                                          | 1                | (<0.5)           | 52                    | (3.4)            | 0.11(0.01-0.80)                     | 0.030   |
| Long acting β-agonist                                           | 0                | (<0.5)           | 1                     | (<0.5)           | n/a                                 |         |
| Oral corticosteroid                                             | 1                | (<0.5)           | 12                    | (0.8)            | 0.74(0.09-5.95)                     | 0.774   |
| Other bronchodilator medication**                               | 1                | (<0.5)           | 7                     | (<0.5)           | 0.87(0.10-7.71)                     | 0.901   |
| Other anti-inflammatory medication***                           | 1                | (<0.5)           | 2                     | (<0.5)           | 5.04(0.40-63.36)                    | 0.211   |

<sup>α</sup> Proportion of cases or controls whose mothers have diagnosis or at least one selected drug prescription in pregnancy

<sup>β</sup> Odds Ratios (95% Confidence Intervals) adjusted for maternal age at birth of case or control child; Maternal smoking status, body mass index, socioeconomic status, sex of the child, gestation of pregnancy had no confounding effects.

<sup>γ</sup> Any asthma medication except oral corticosteroids

\*Reference groups are mothers with no prescriptions for the selected drug group in pregnancy

\*\*Aminophylline, theophylline, ephedrine, orciprenaline, tiotropium, or ipratropium

\*\*\*Cromoglicate, nedocromil, montelukast or zafirlukast
